# Supplementary material
Source: PubMed Central journal article supplement (PMC3030332)
Supplement: supp_M110.177790_jbc.M110.177790-1.pdf [file supp_M110.177790_jbc.M110.177790-1.pdf]

## Supplemental Figure 1

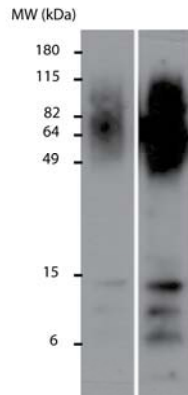

**Figure S1:** Characterization of A $\beta$ O<sub>s</sub> preparation. Representative western immunoblot of an A $\beta$ O preparation probed with rabbit polyclonal anti-oligomer antibody. The left panel shows a lightly exposed film to facilitate evaluation of the size range of higher molecular weight oligomers, and the right panel shows a stronger film exposure of the same membrane to allow detection of low-n oligomers (dimers, trimers, tetramers). The size of aggregates varied from dimers (~ 9 kDa) to higher molecular weight oligomers (~50-100 kDa).
